# Supplementary material for: Establishing a Novel Gene Signature Related to Histone Modifications for Predicting Prognosis in Lung Adenocarcinoma
Source: Hindawi journal article supplement (doi:10.1155/2022/8802573), 2022-09-23

A

## Top10 geneontology\_Biological\_Process

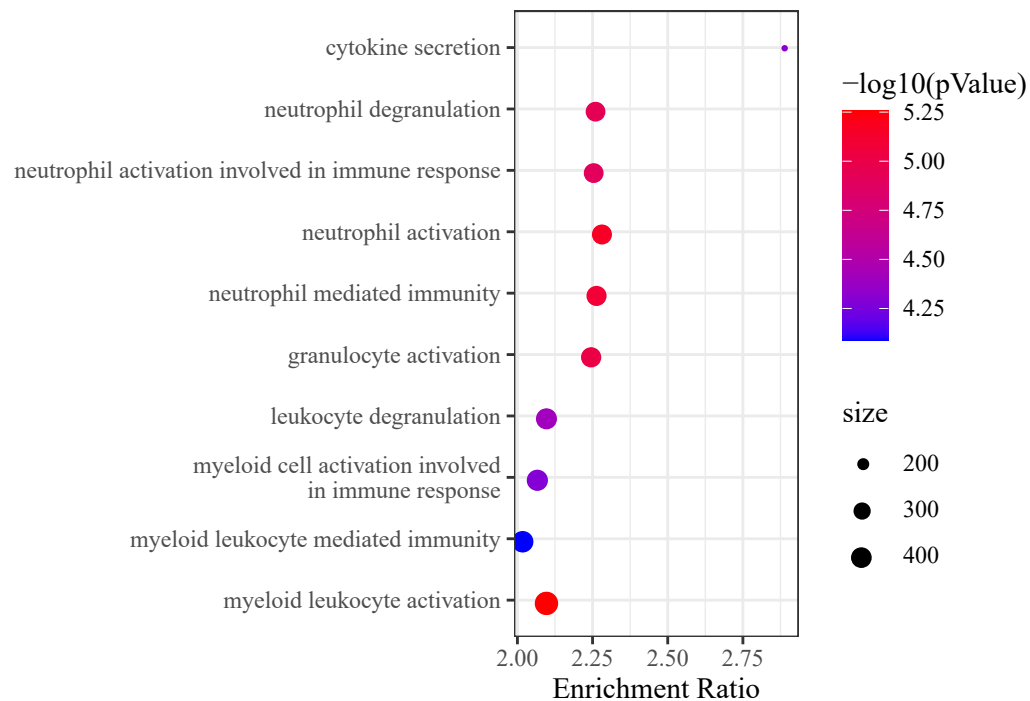

B

## Top10 geneontology\_Cellular\_Component

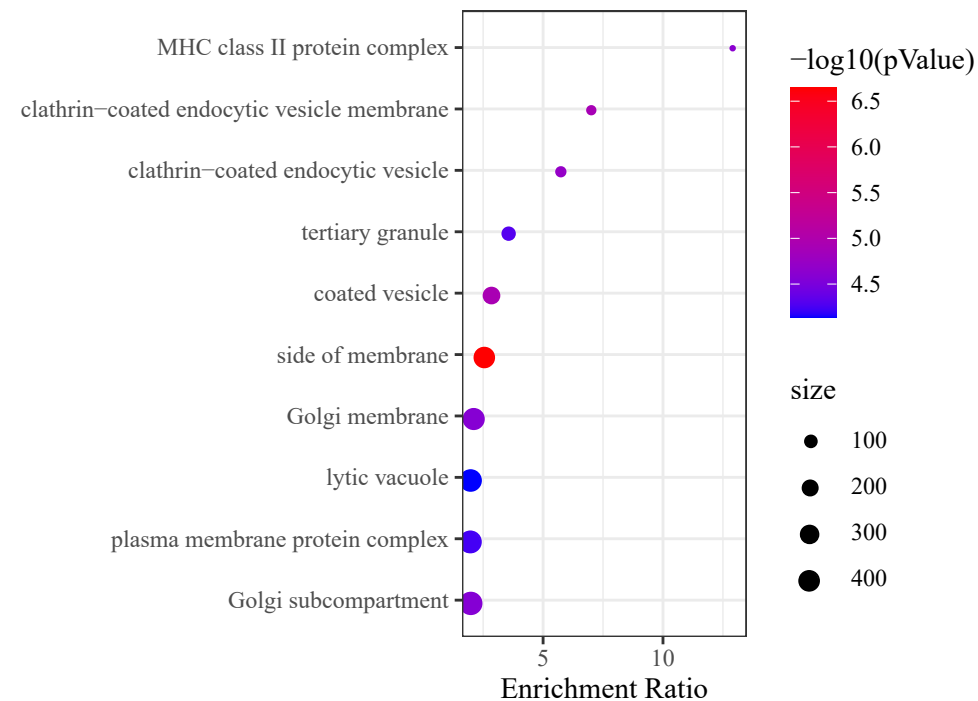

C

## All geneontology\_Molecular\_Function

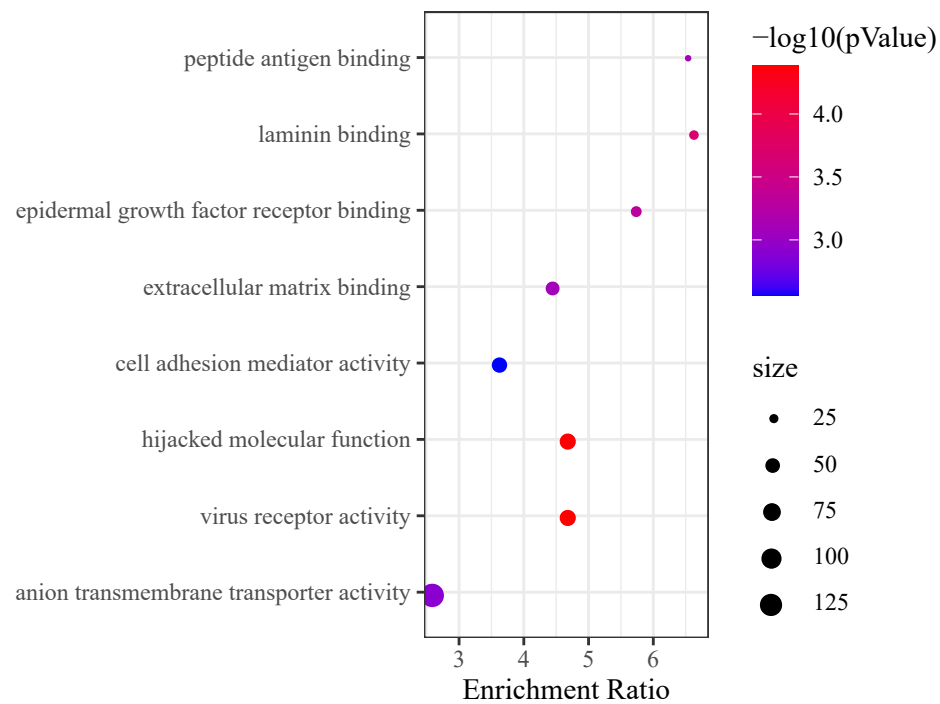

D

## Top10 pathway\_KEGG

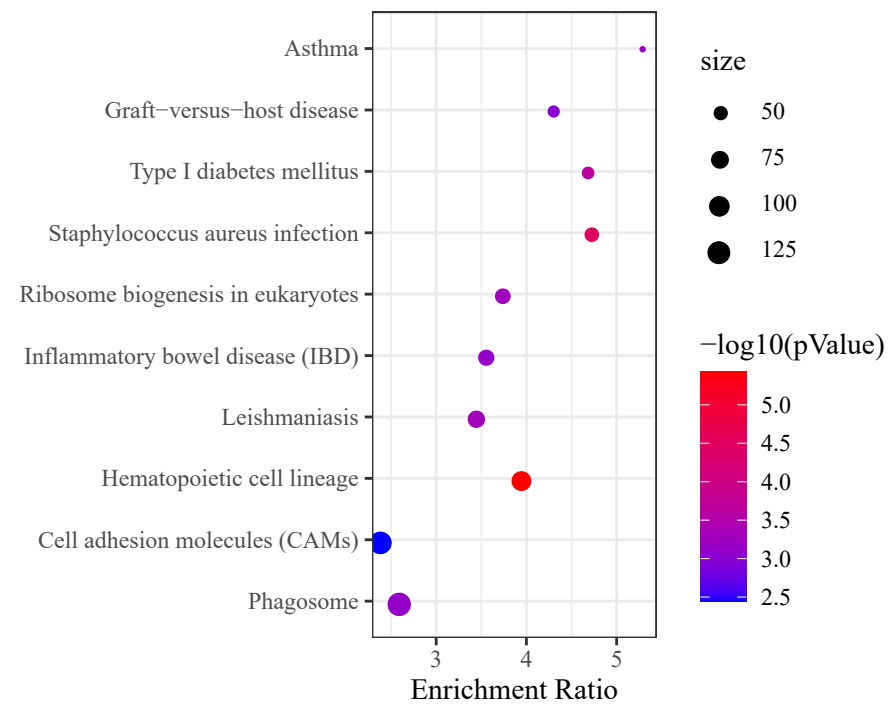

Supplement: f1 [file 8802573.f1.zip]
