# Supplementary figures and images for: Establishing a Novel Gene Signature Related to Histone Modifications for Predicting Prognosis in Lung Adenocarcinoma
Source: Hindawi journal article supplement (doi:10.1155/2022/8802573), 2022-09-23

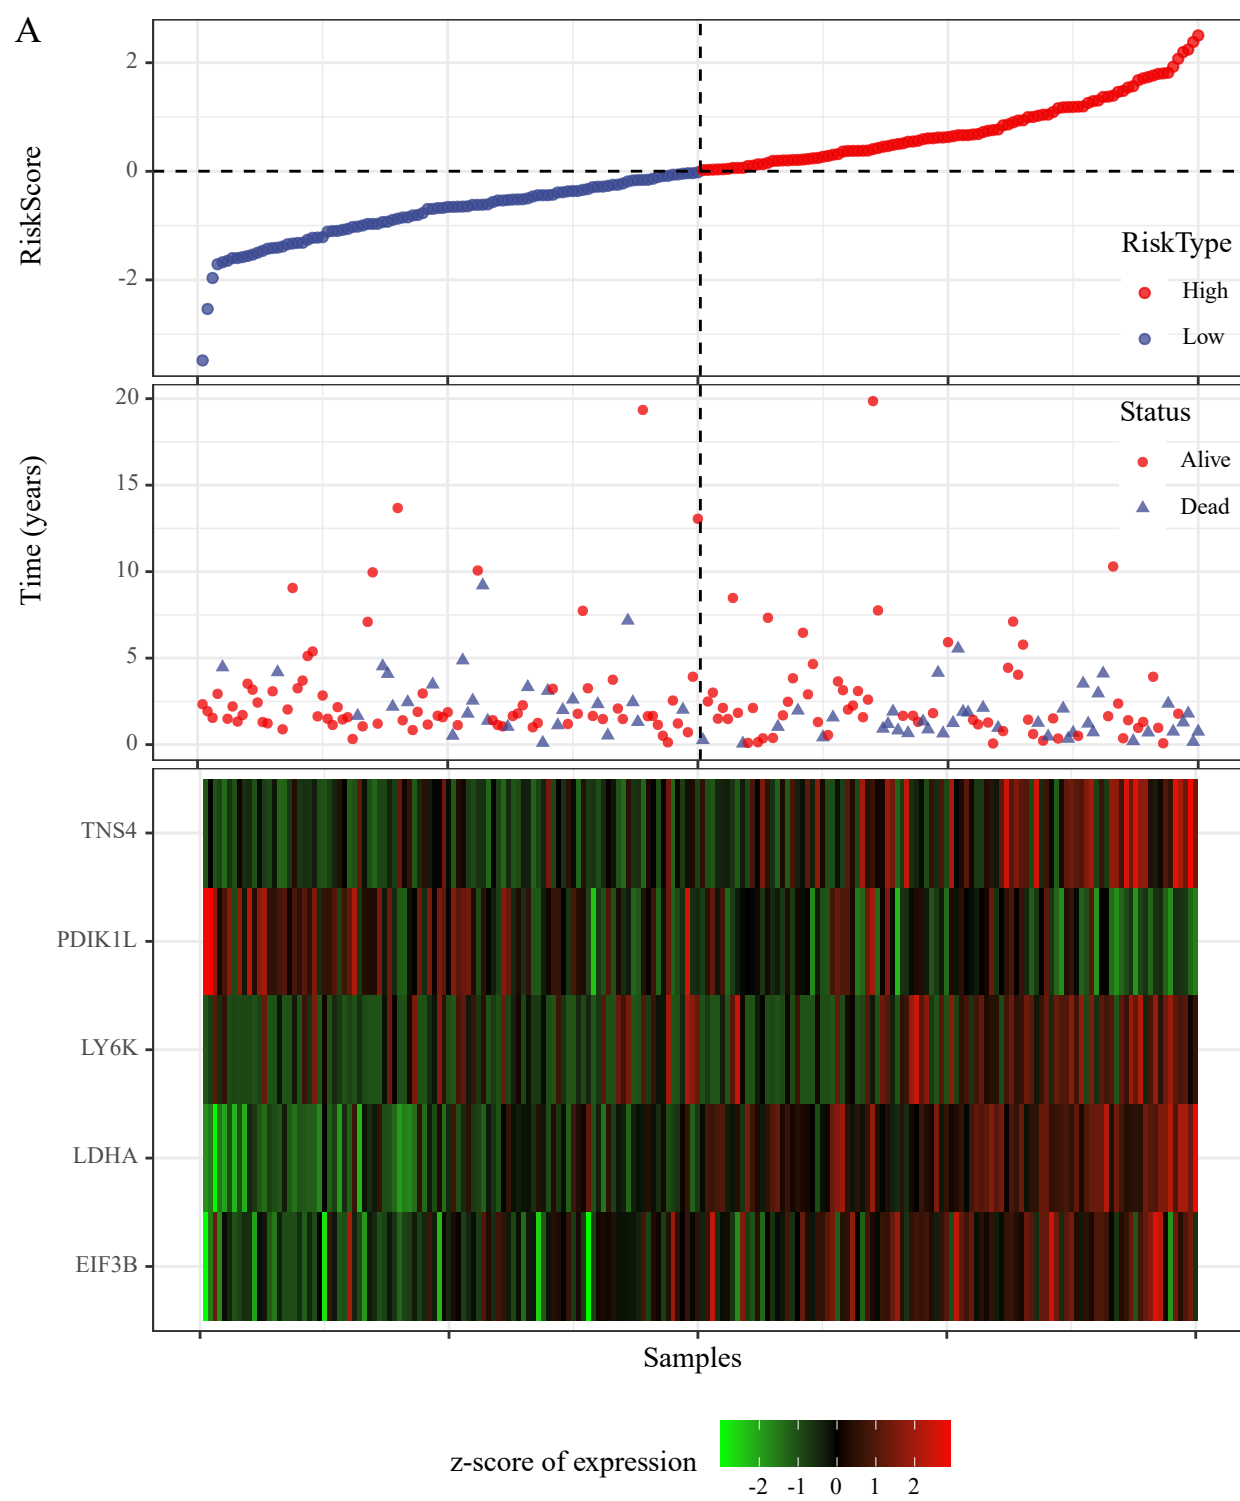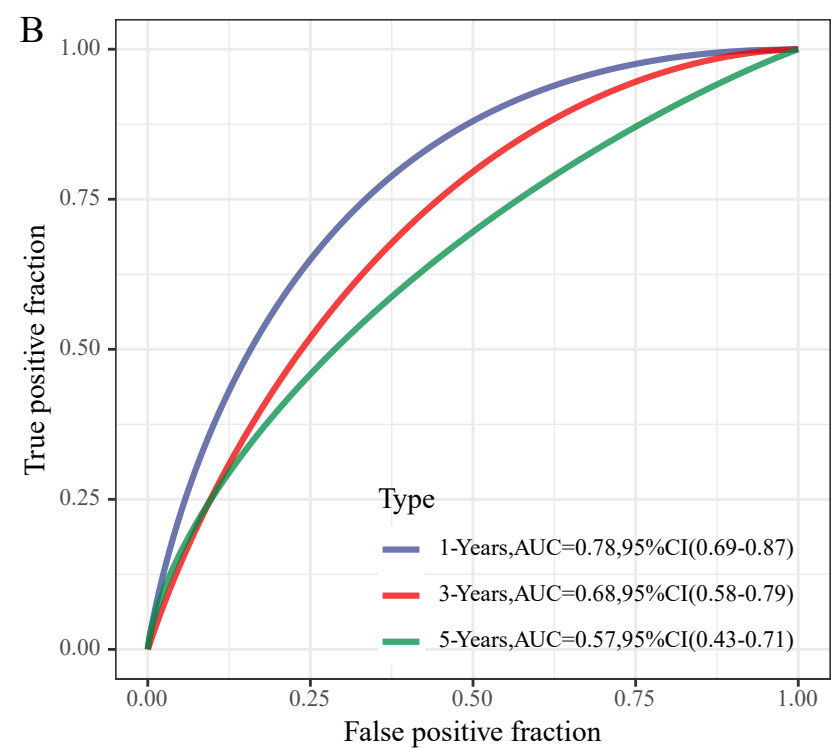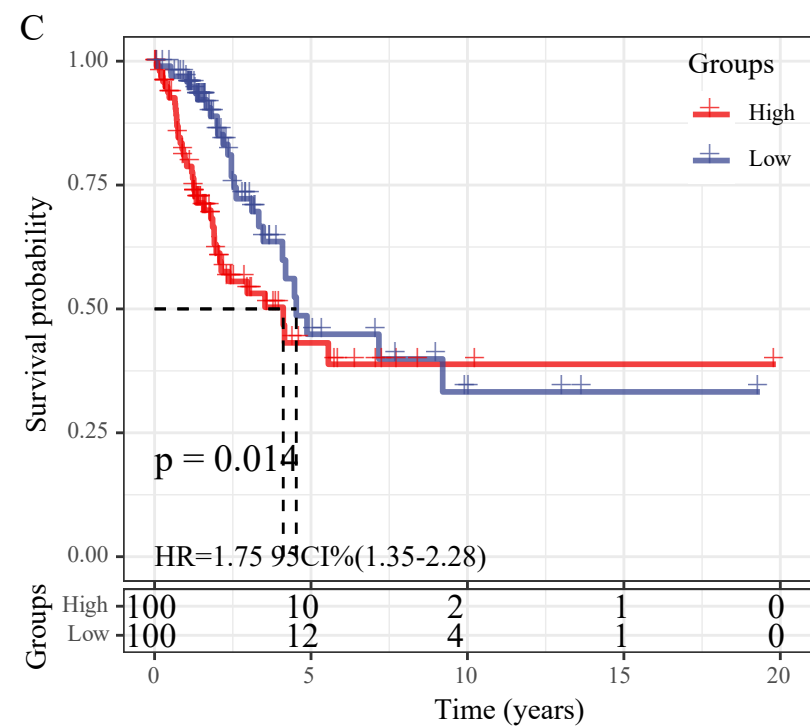

Supplement: f1 [file 8802573.f1.zip]

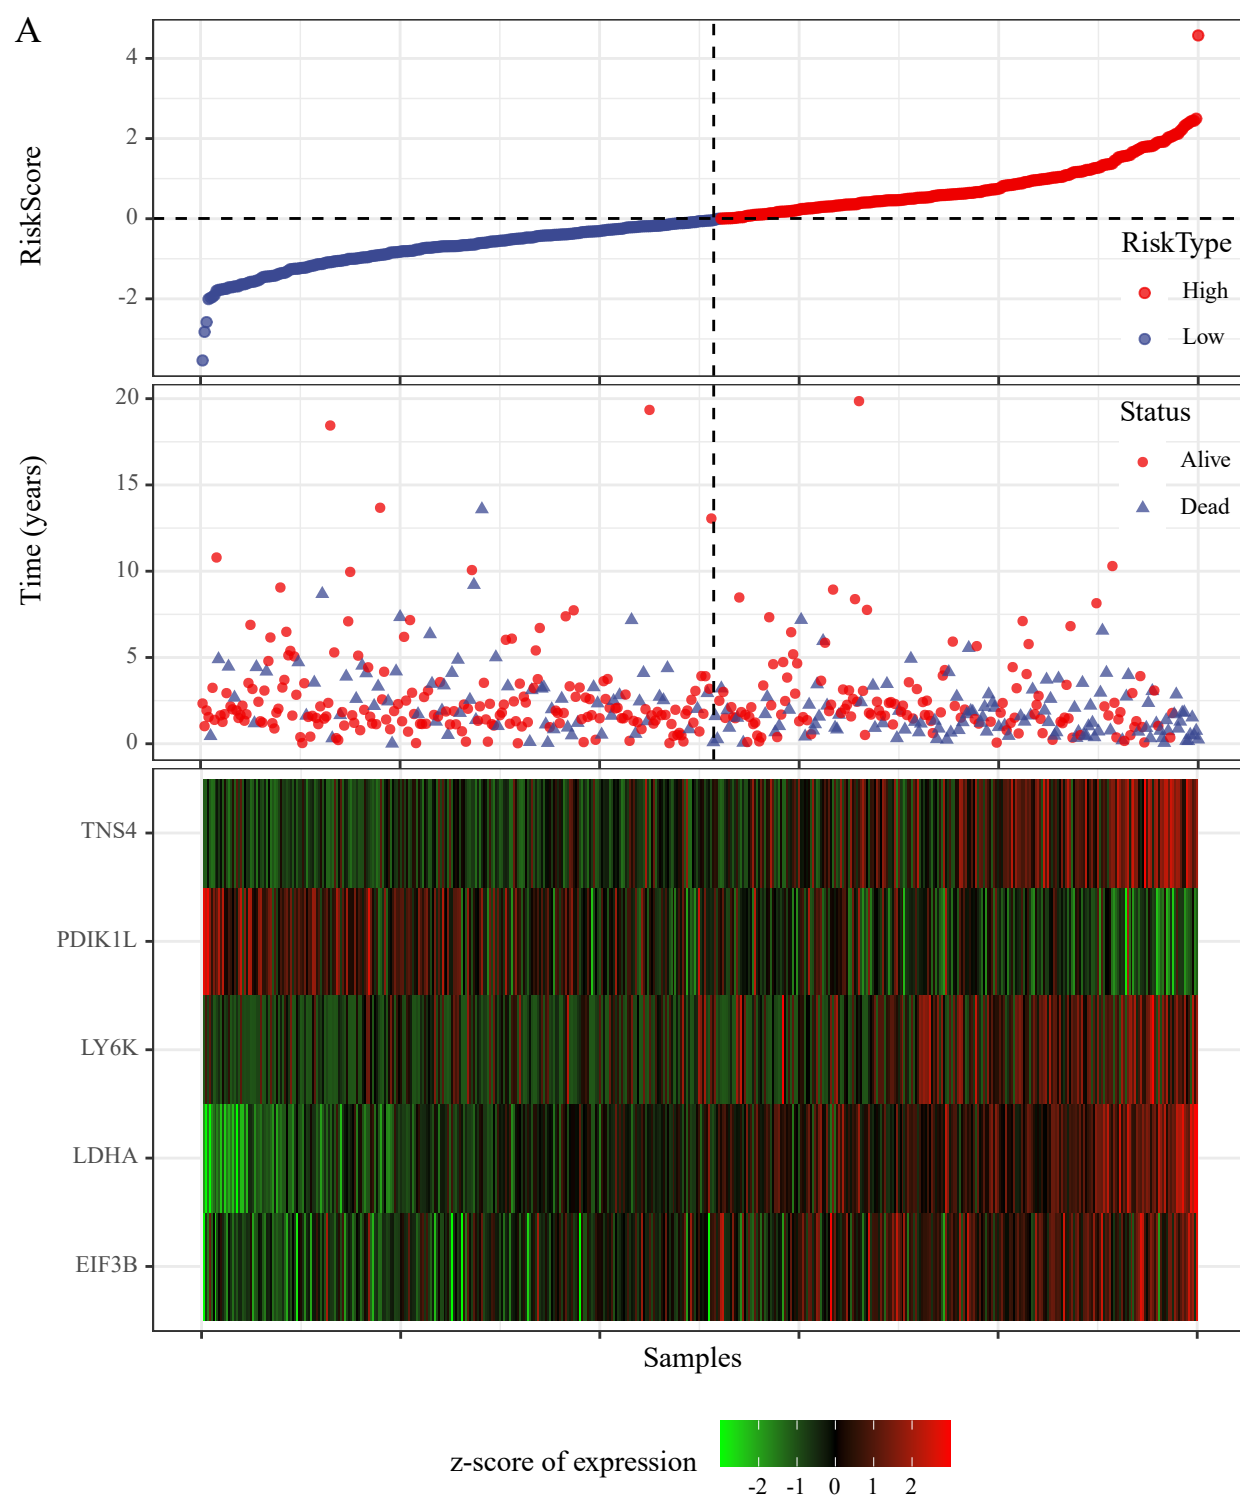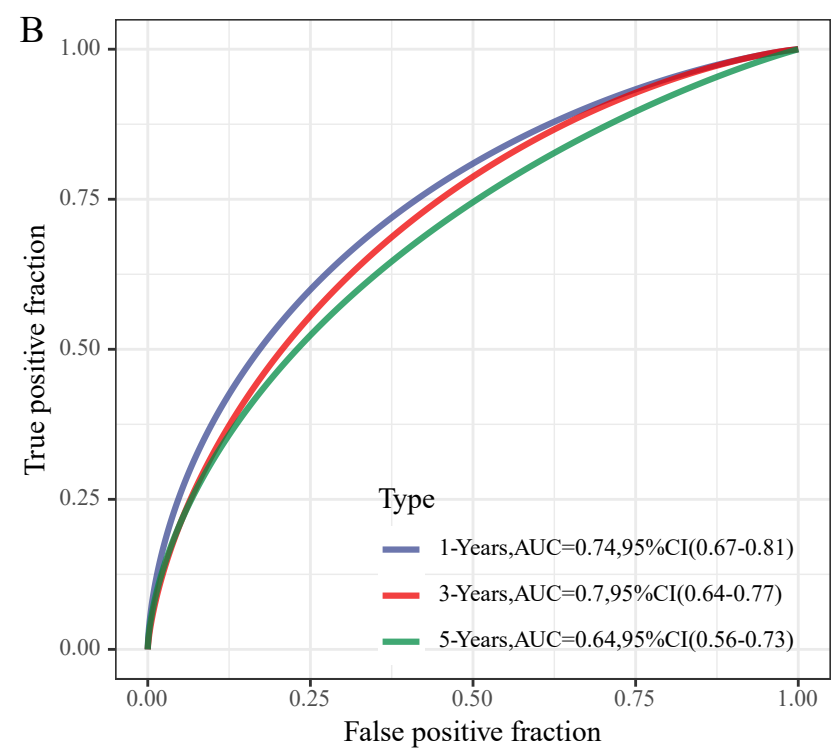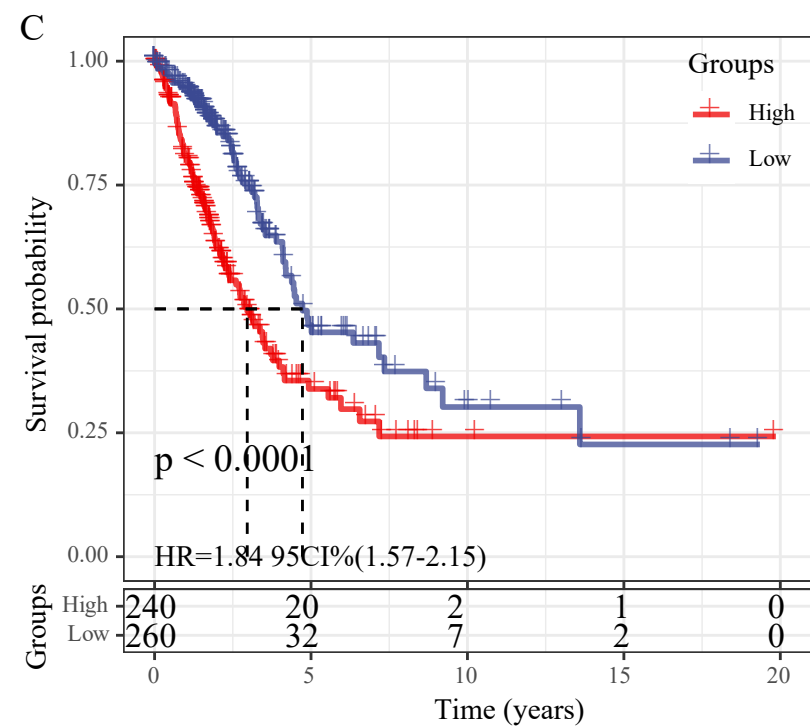

Supplement: f1 [file 8802573.f1.zip]

A

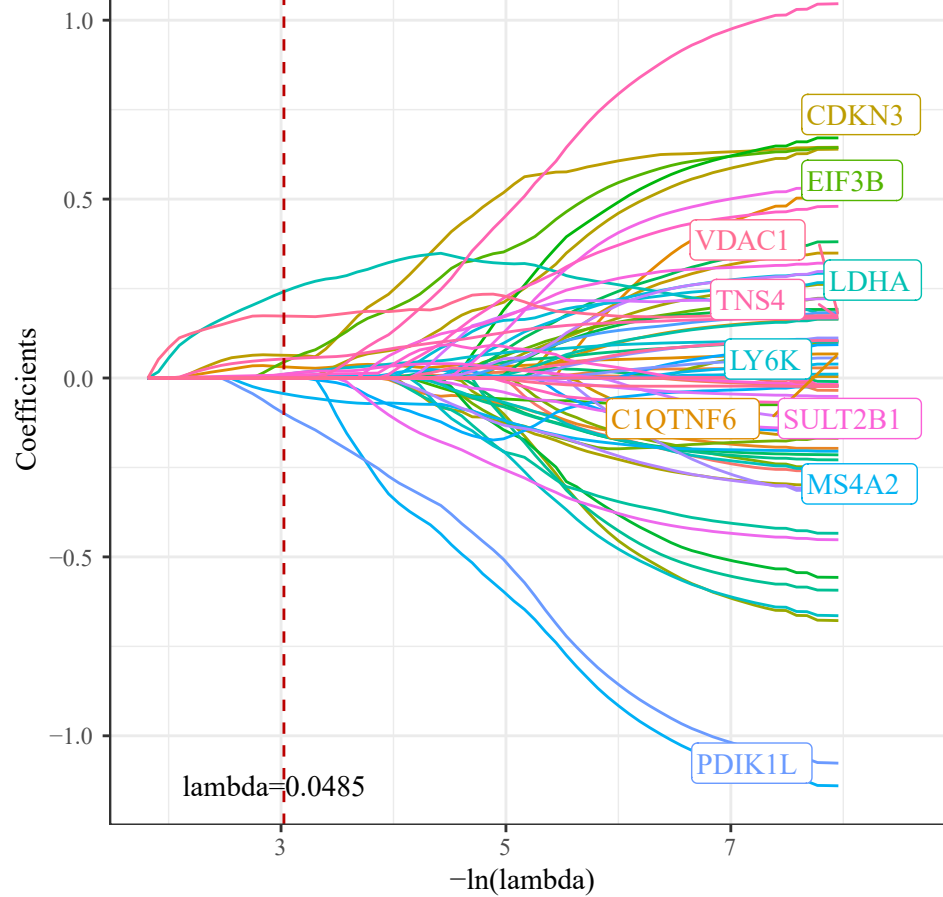

B

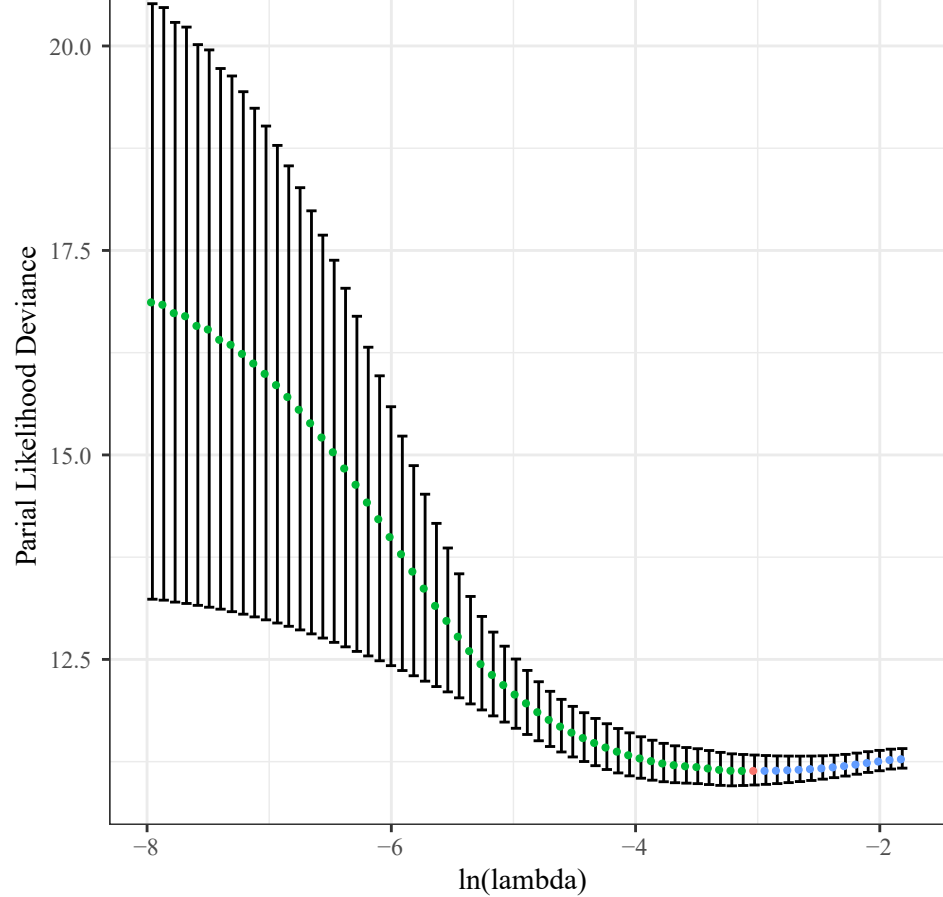

Supplement: f1 [file 8802573.f1.zip]

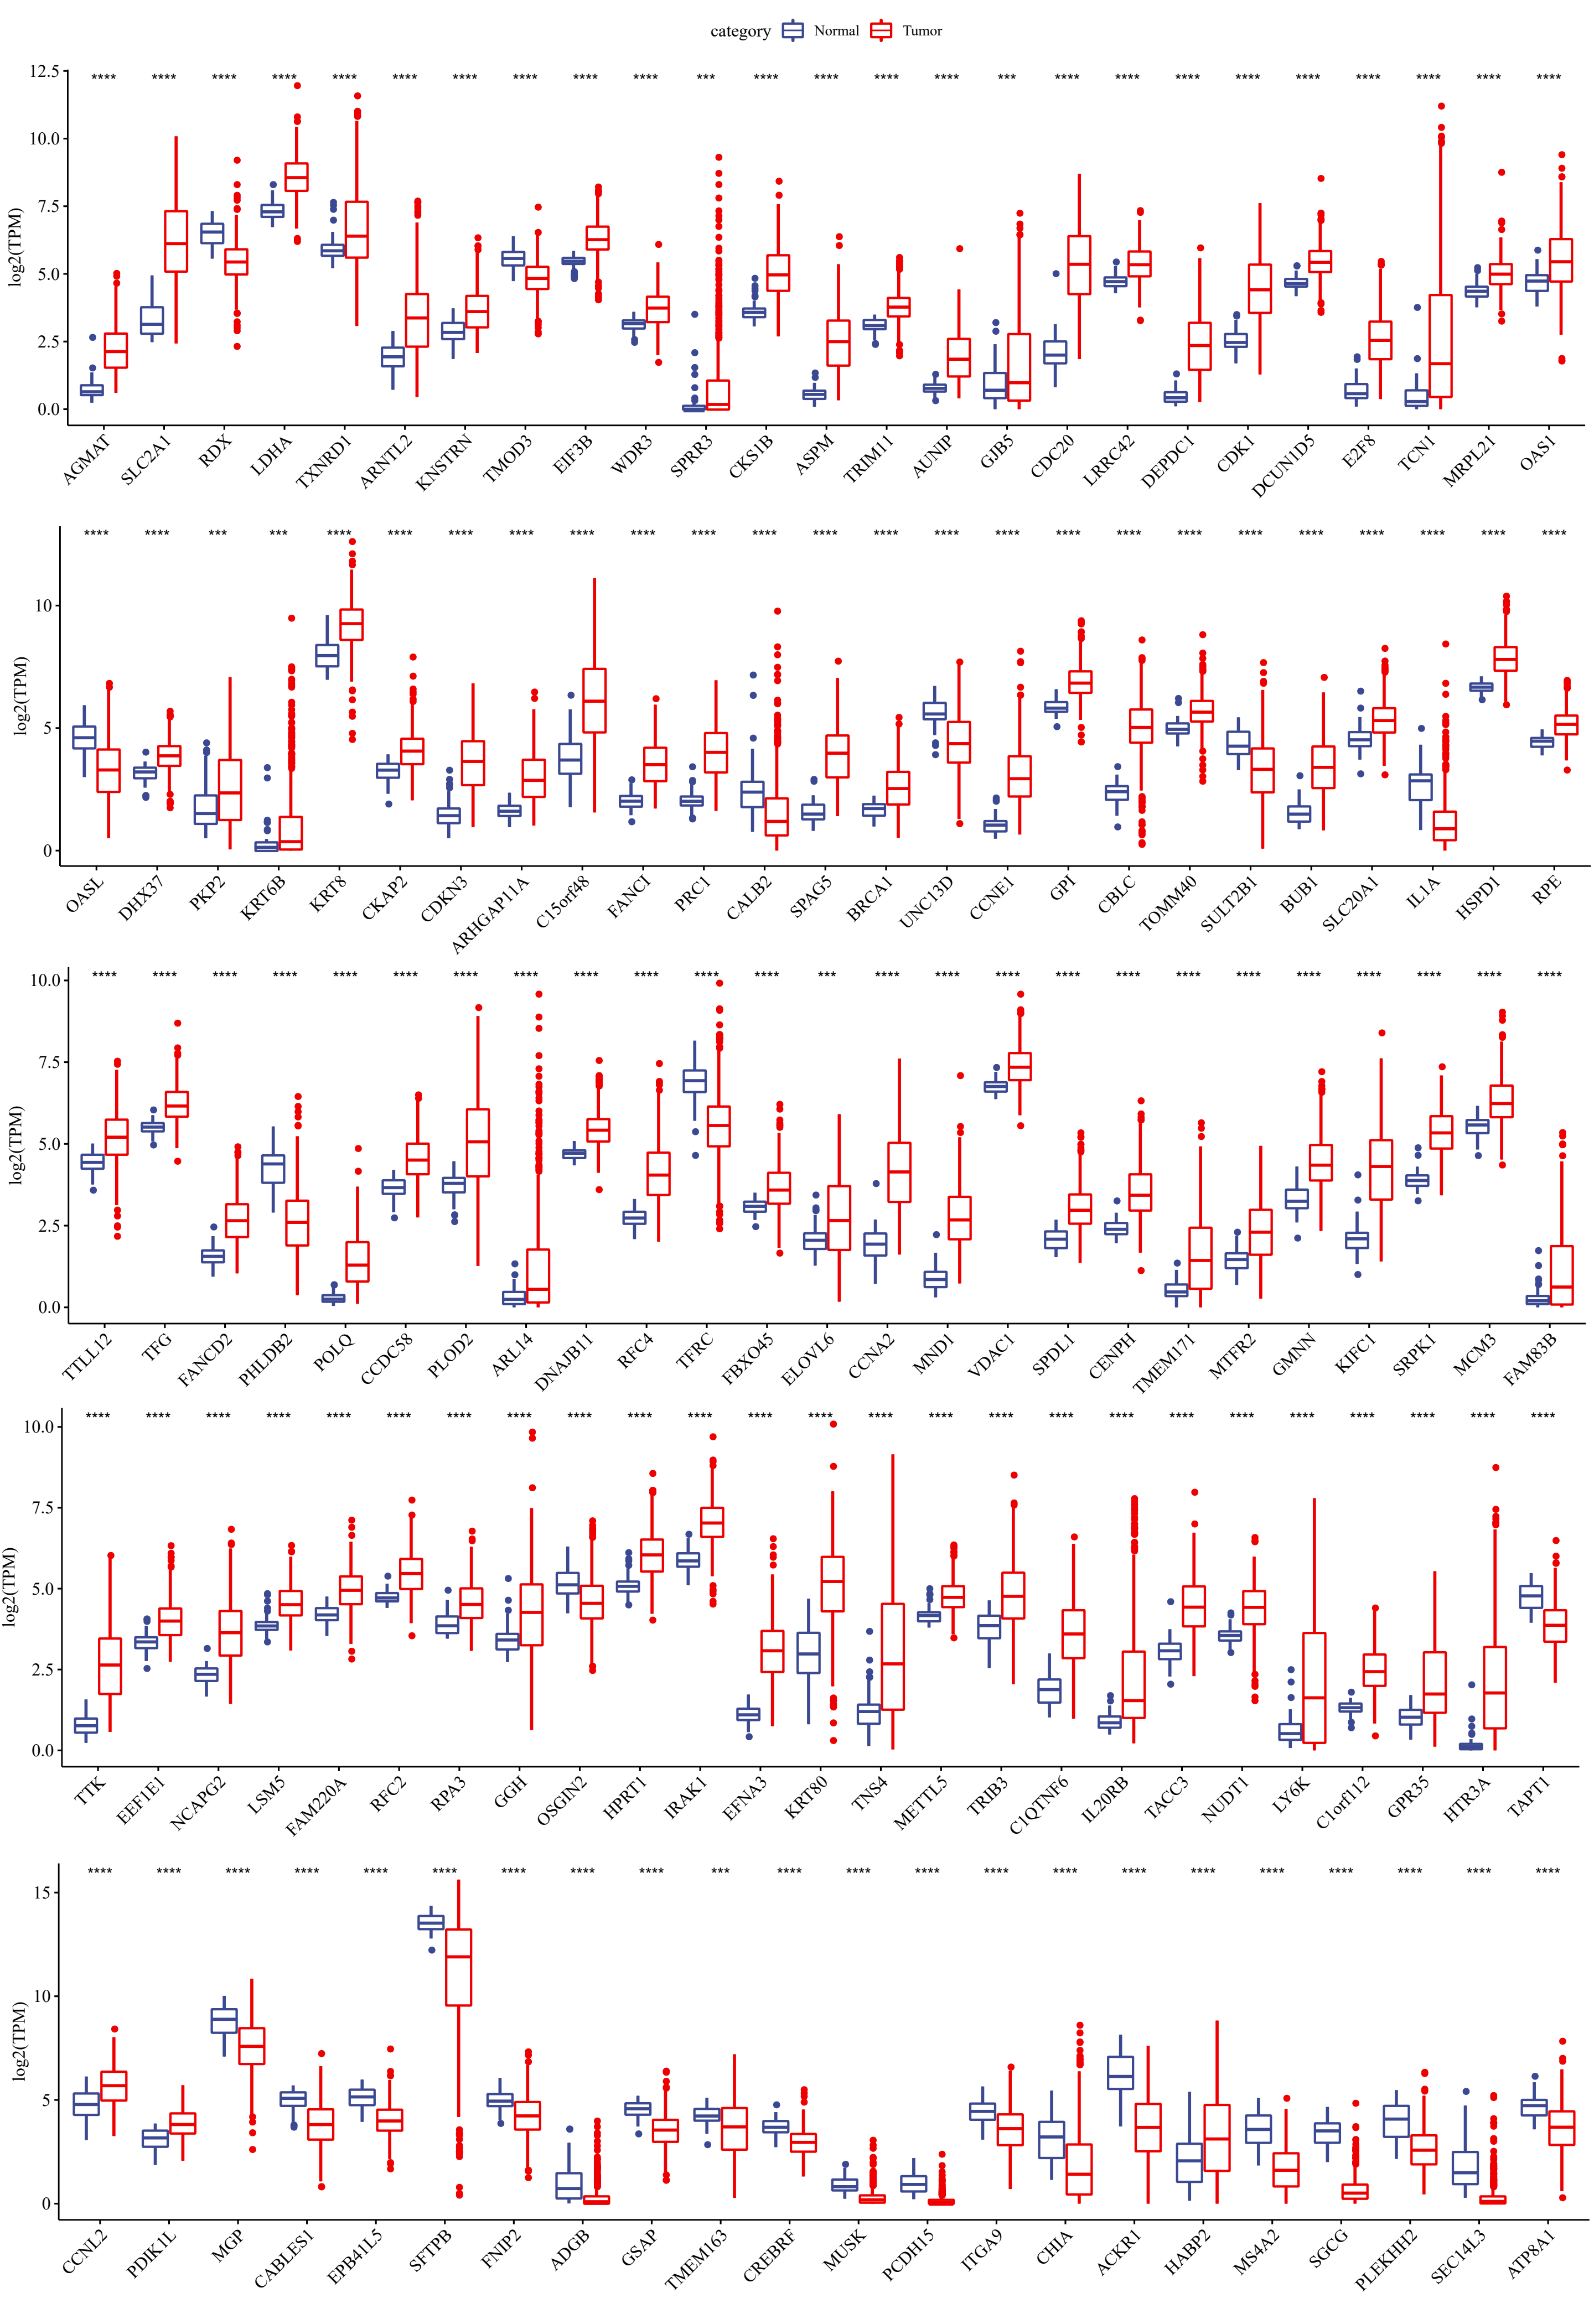

Supplement: f1 [file 8802573.f1.zip]

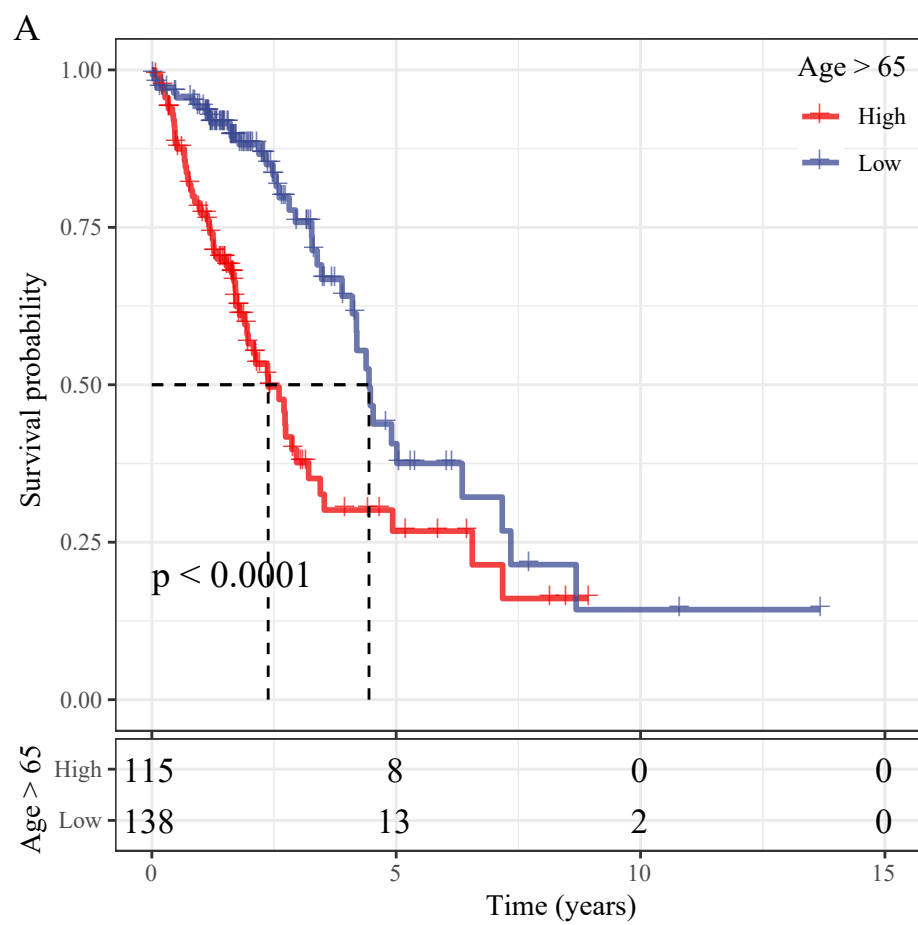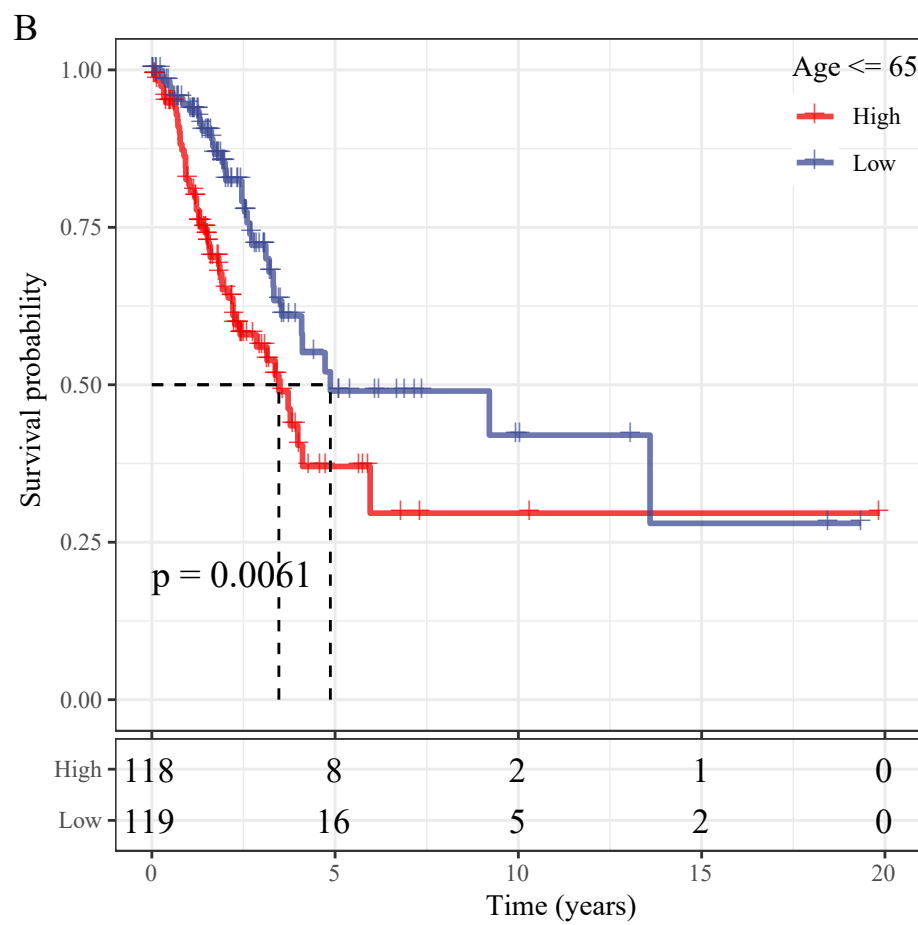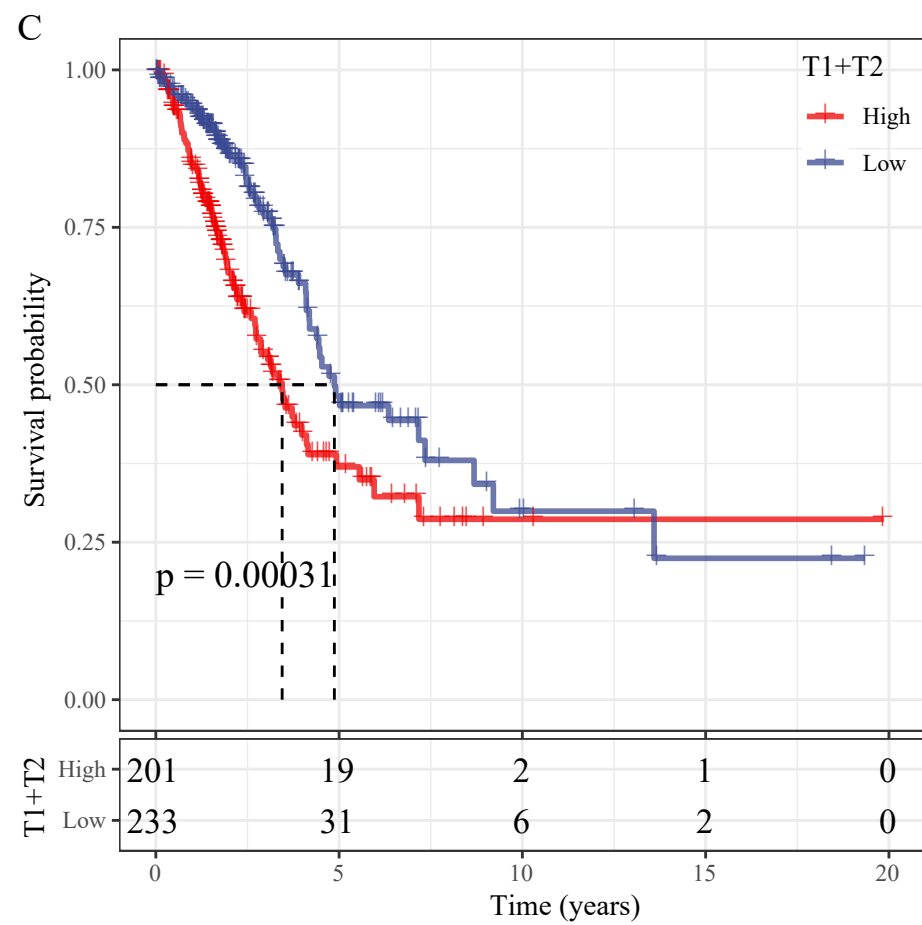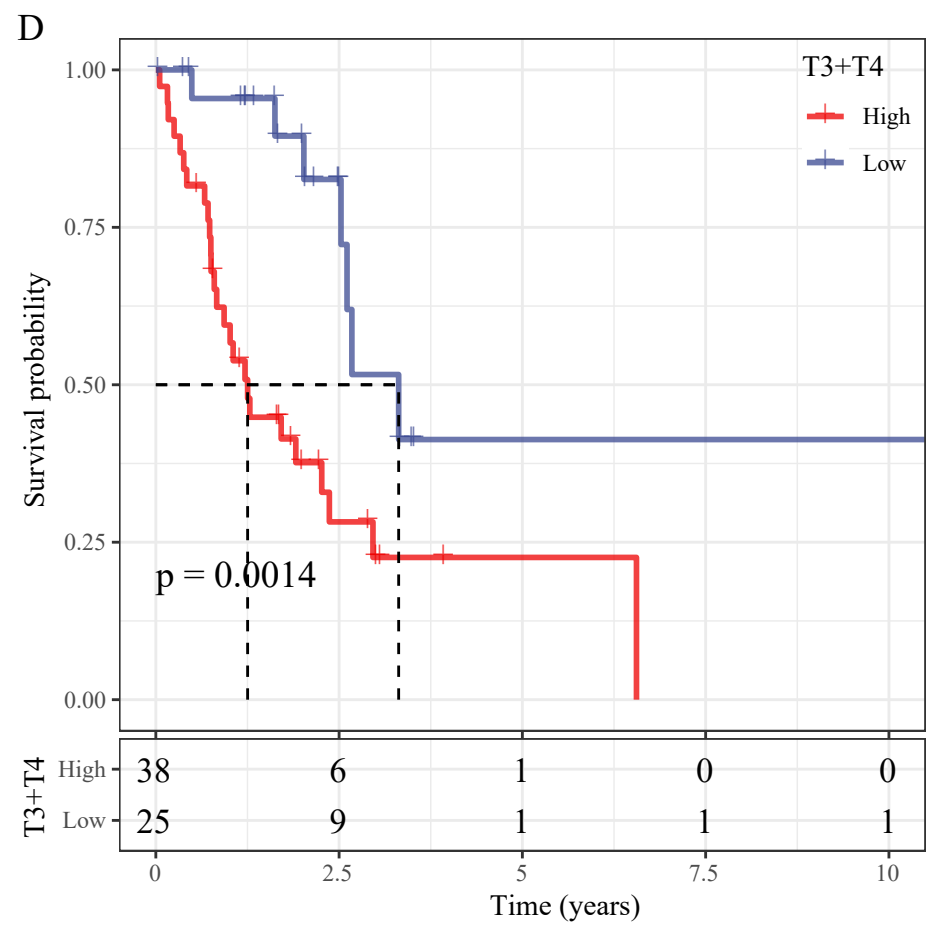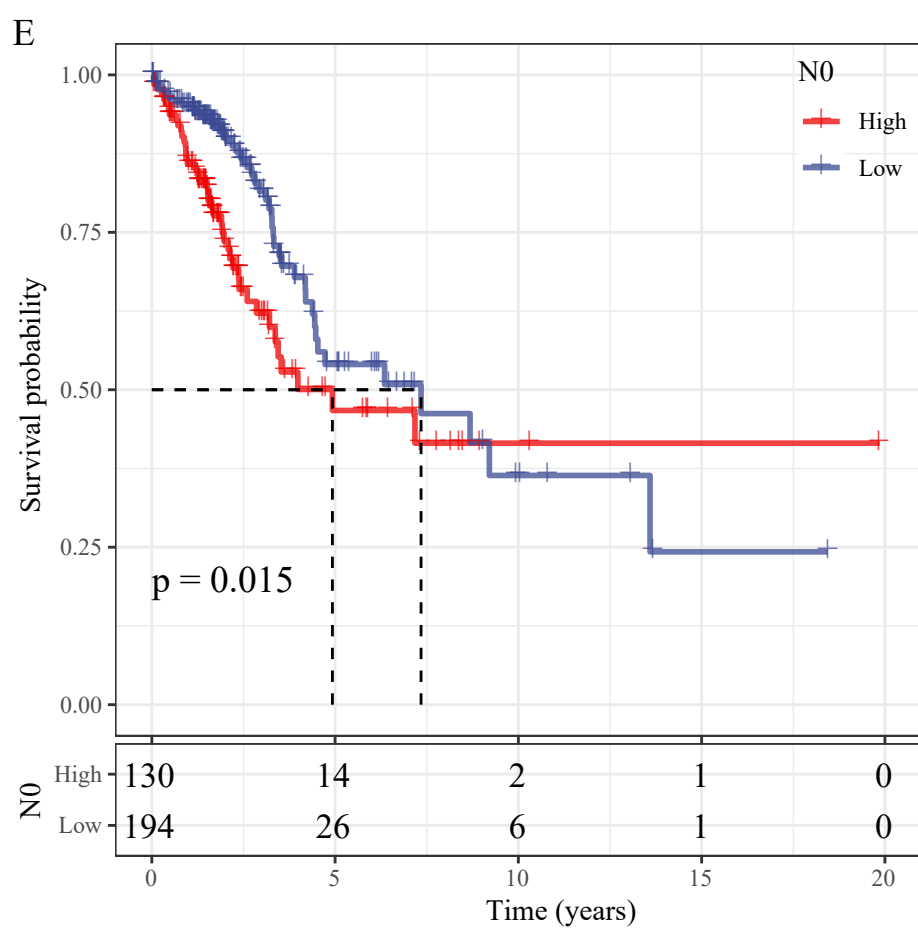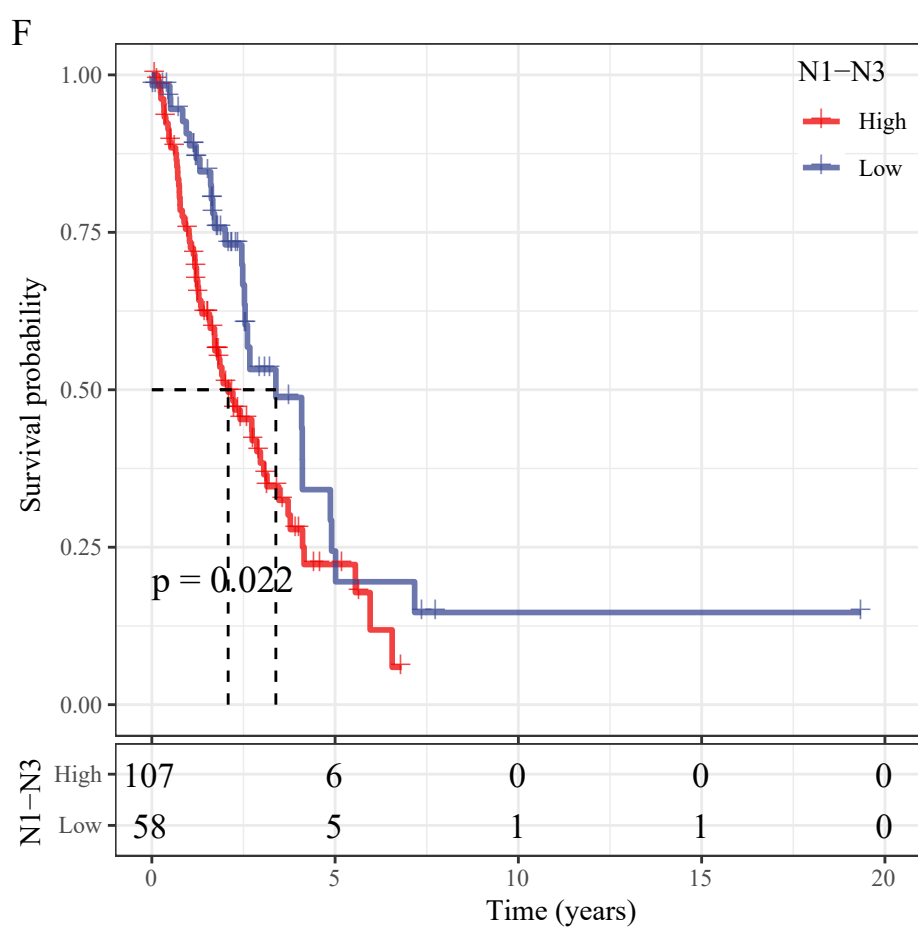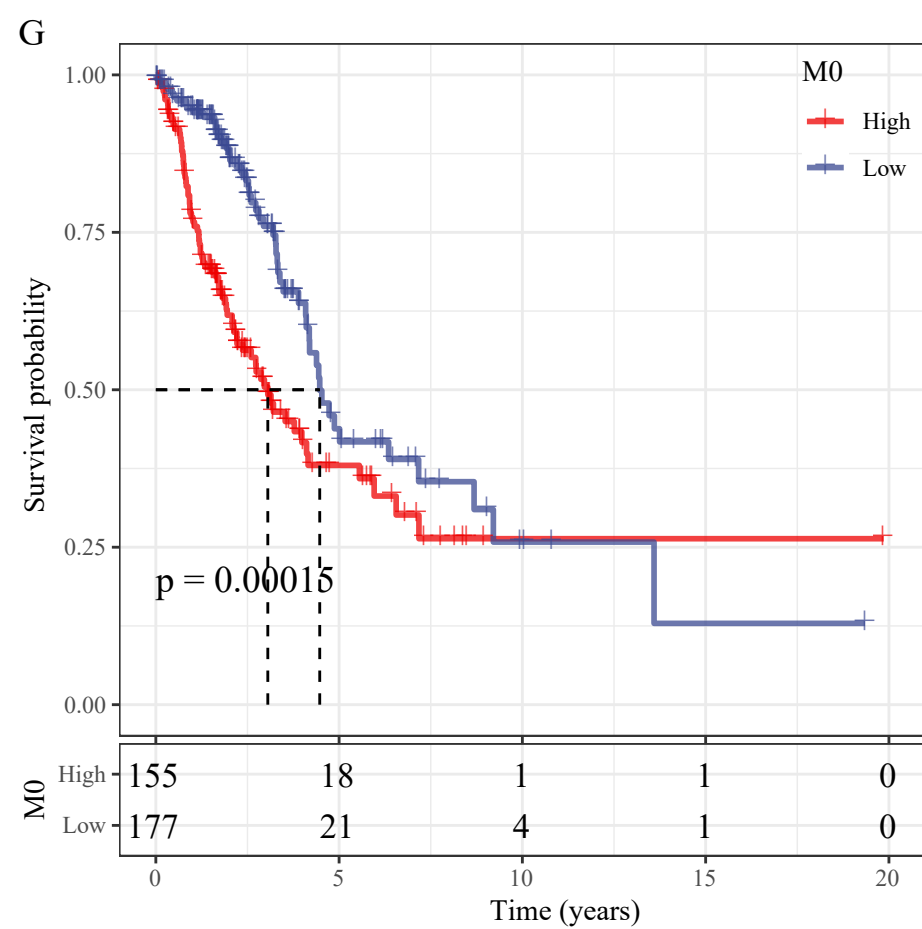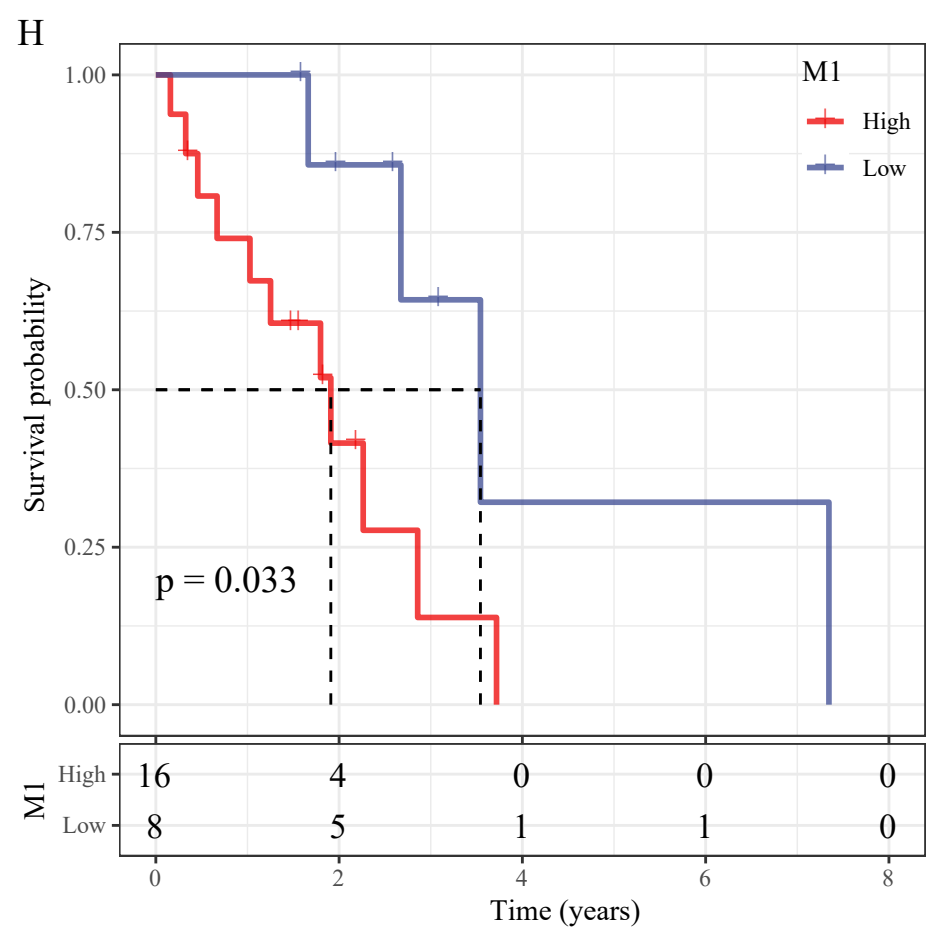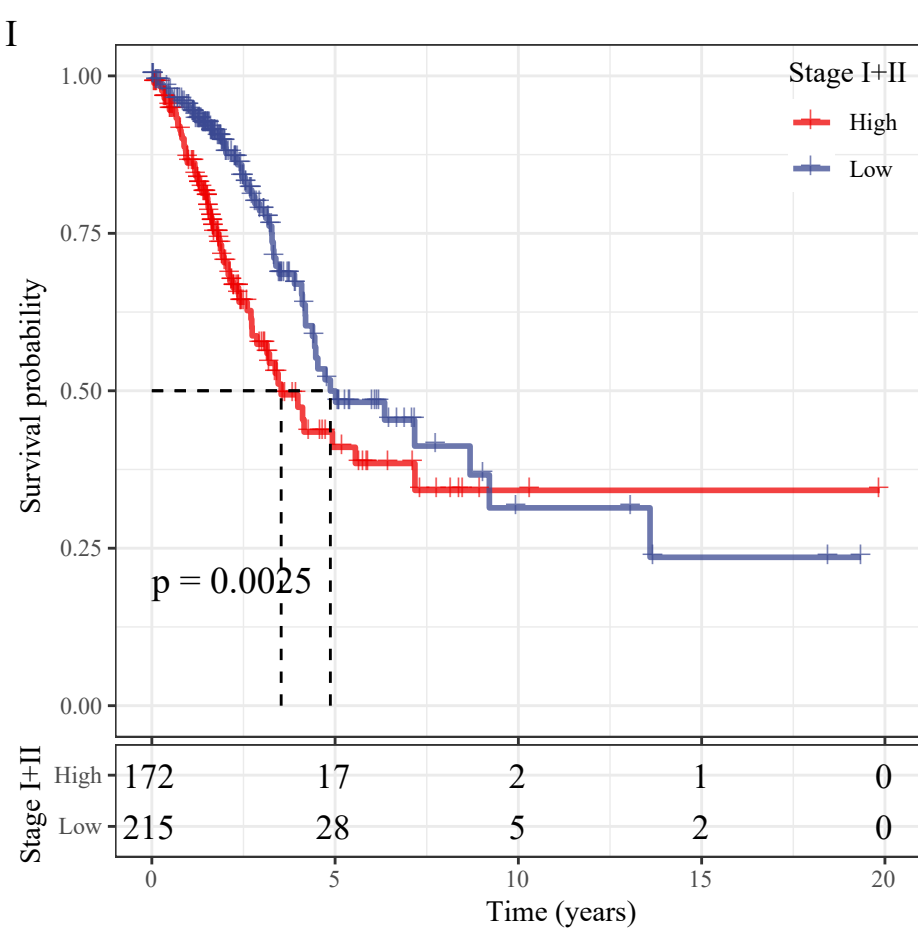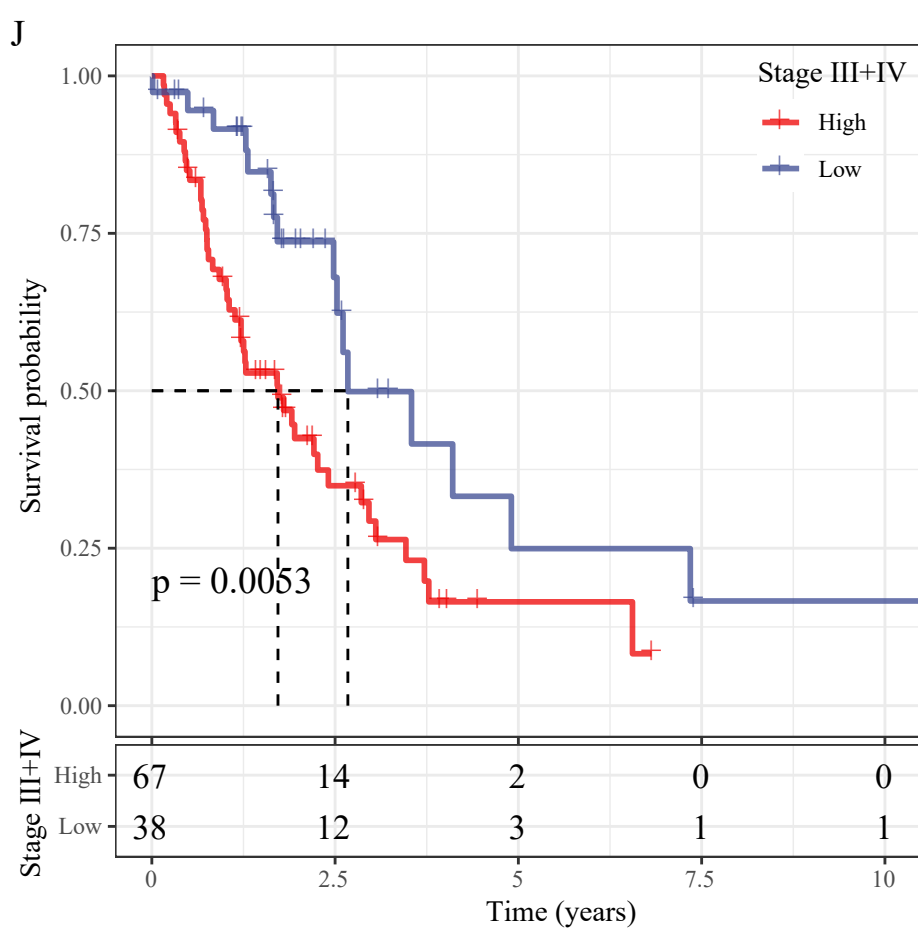

Supplement: f1 [file 8802573.f1.zip]

**A**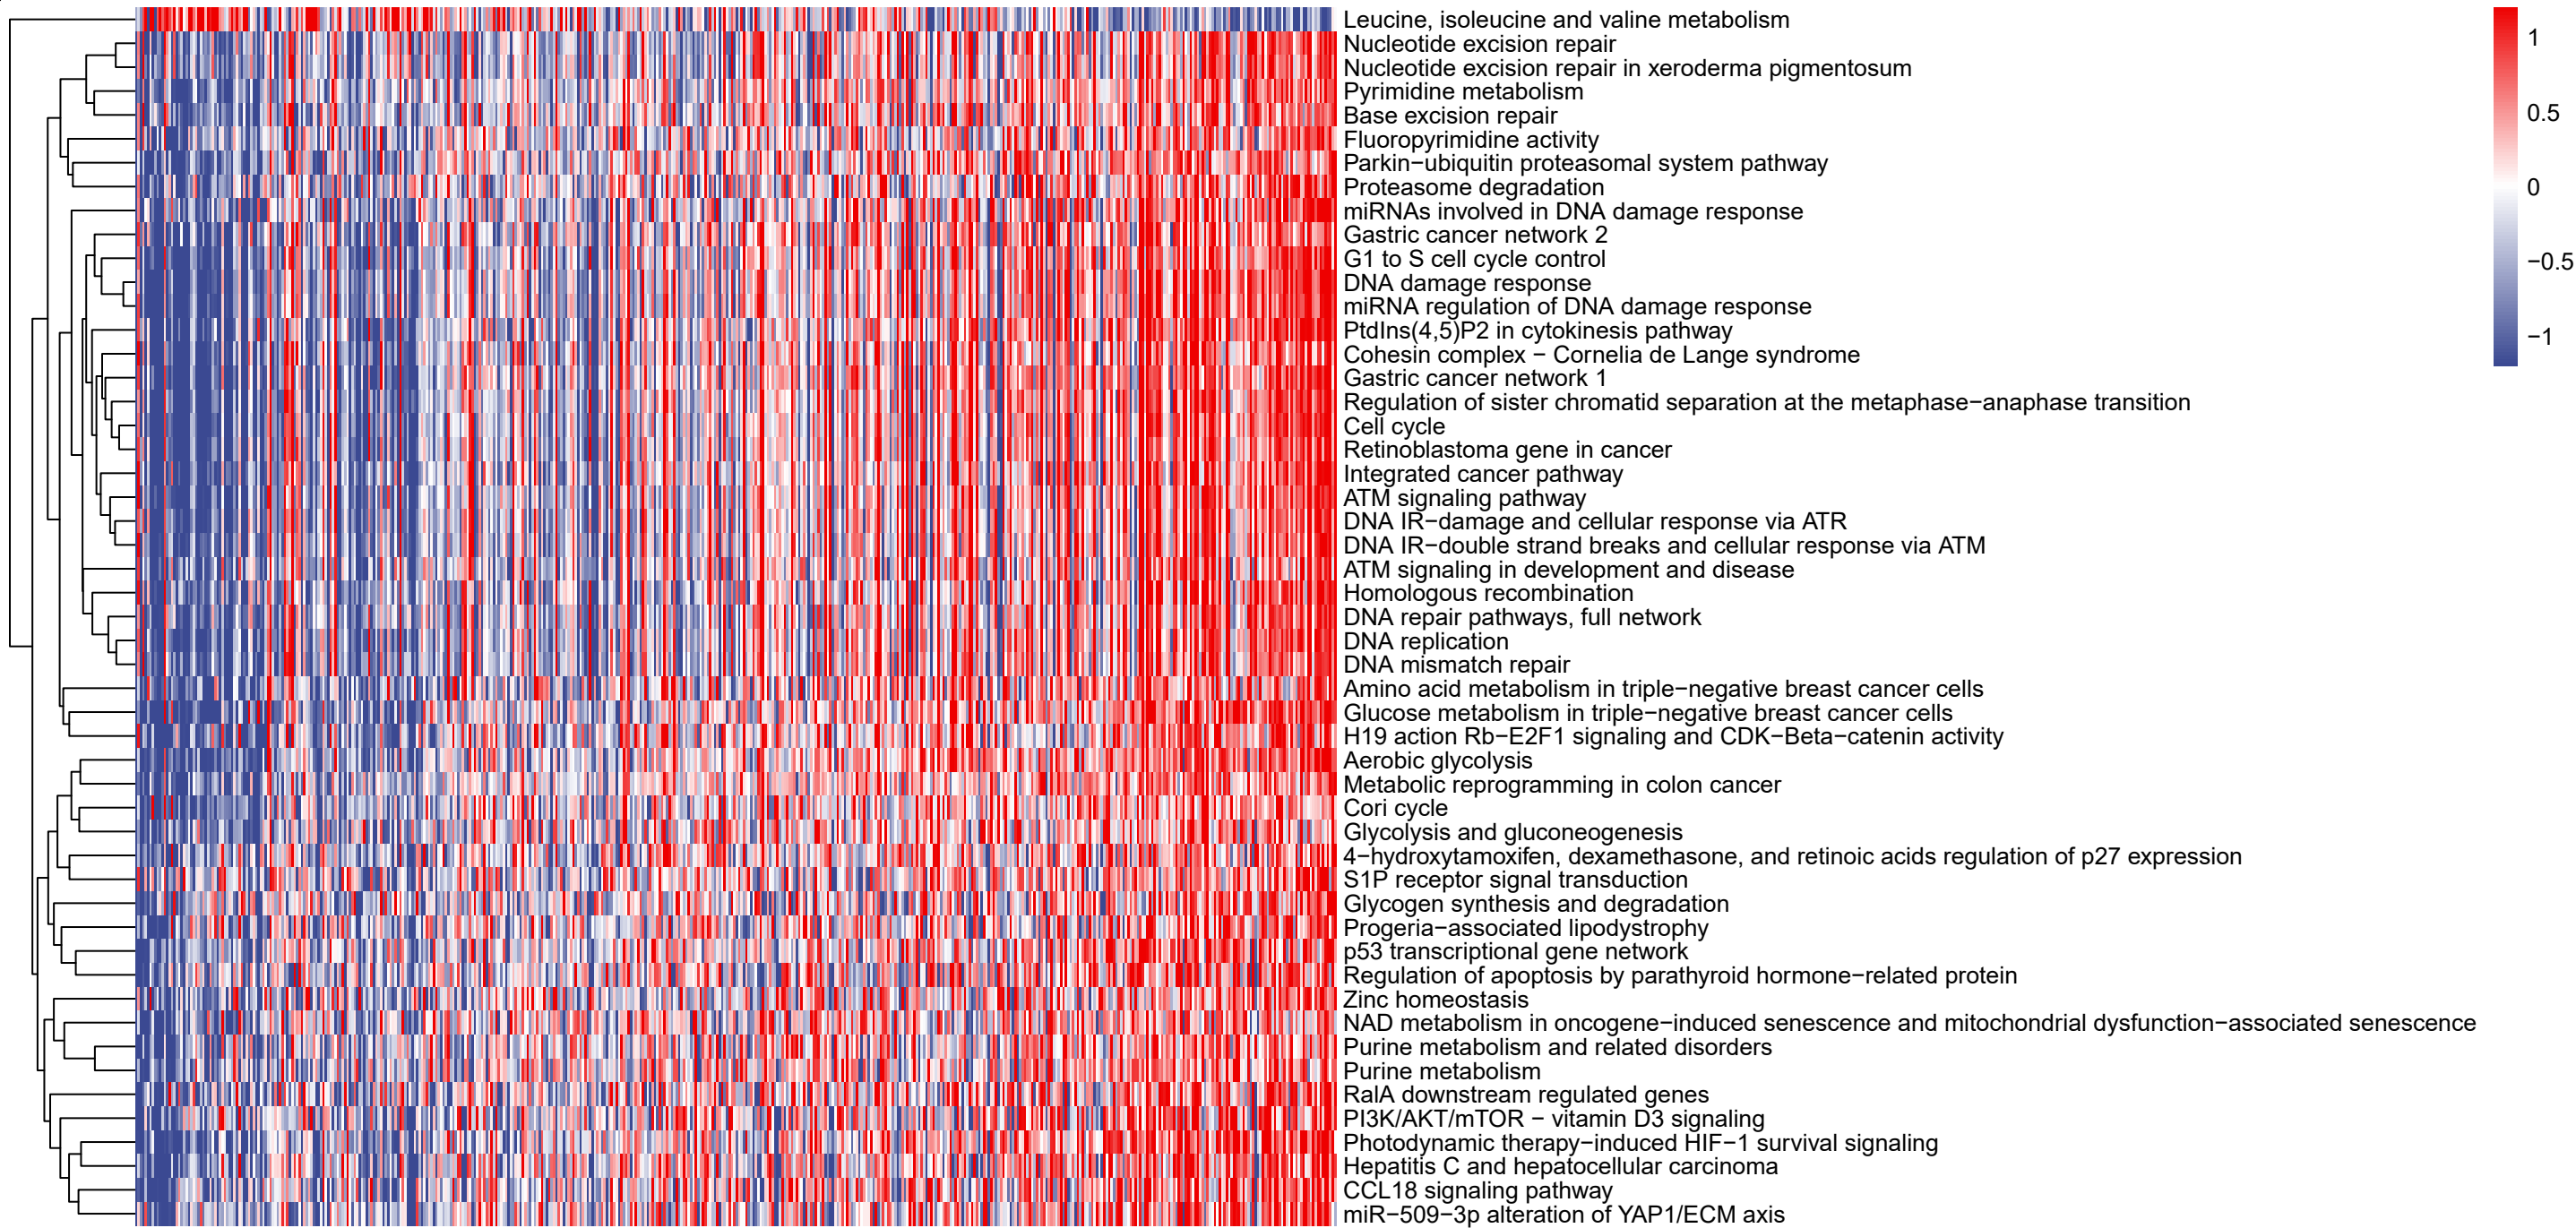**B**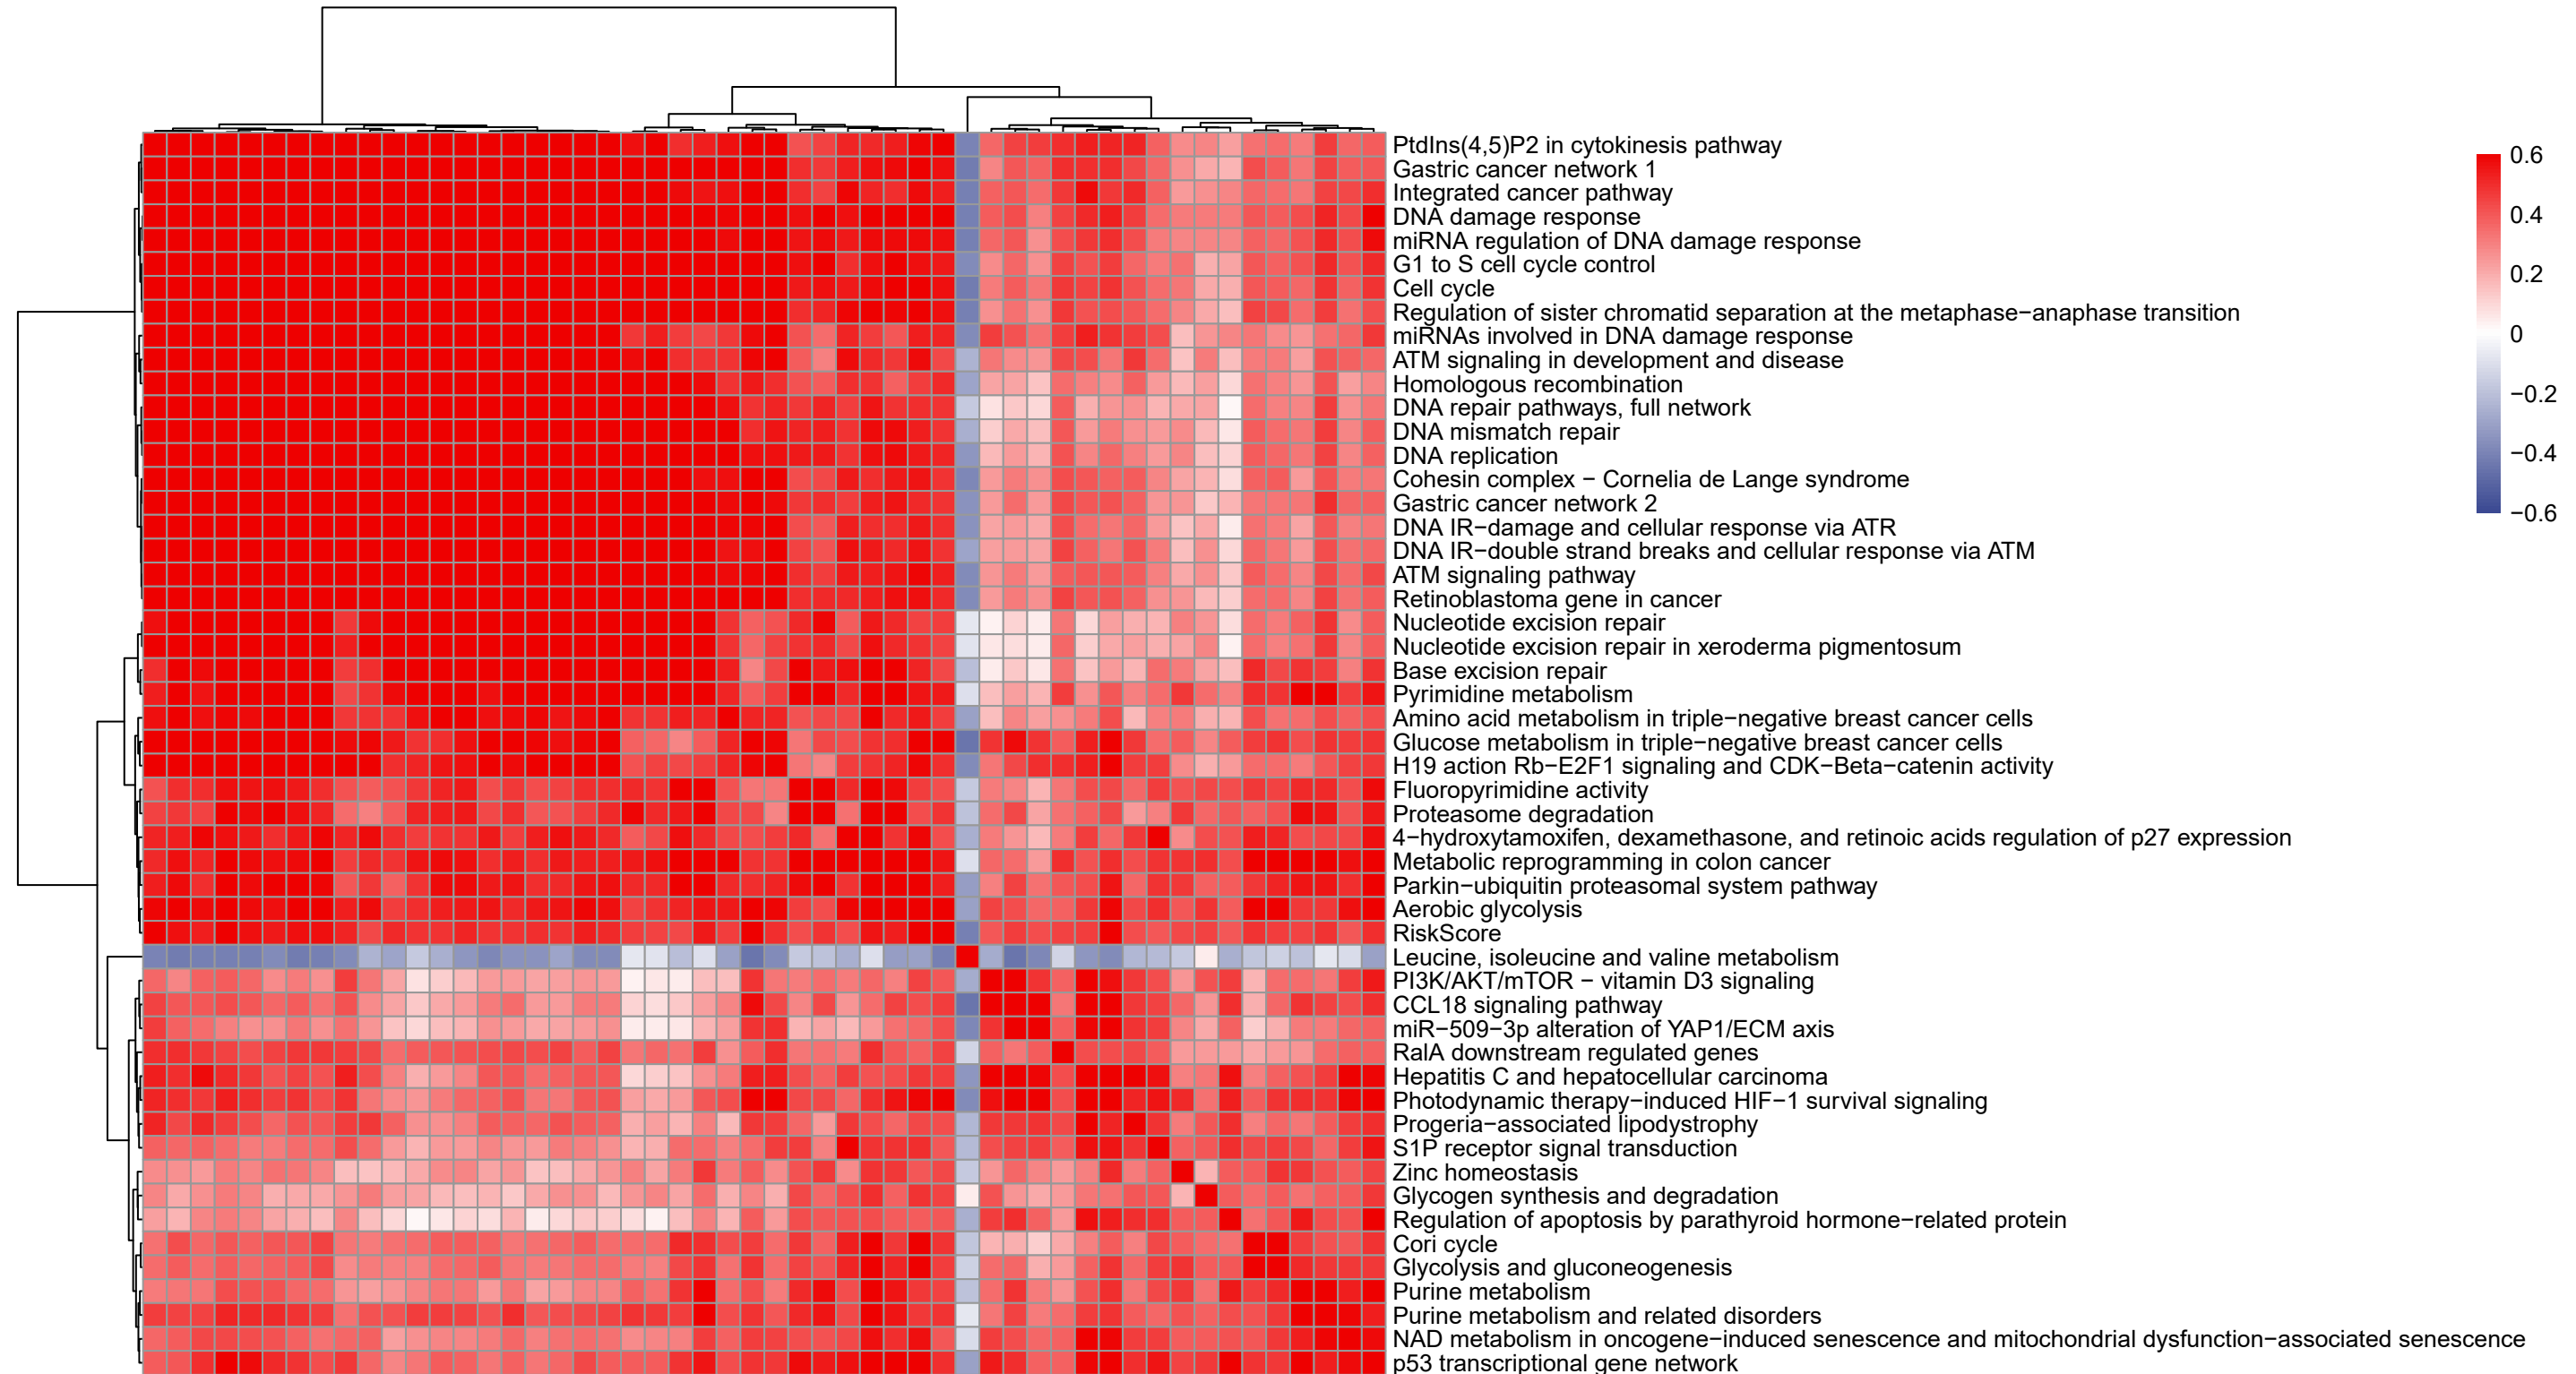

Supplement: f1 [file 8802573.f1.zip]

A

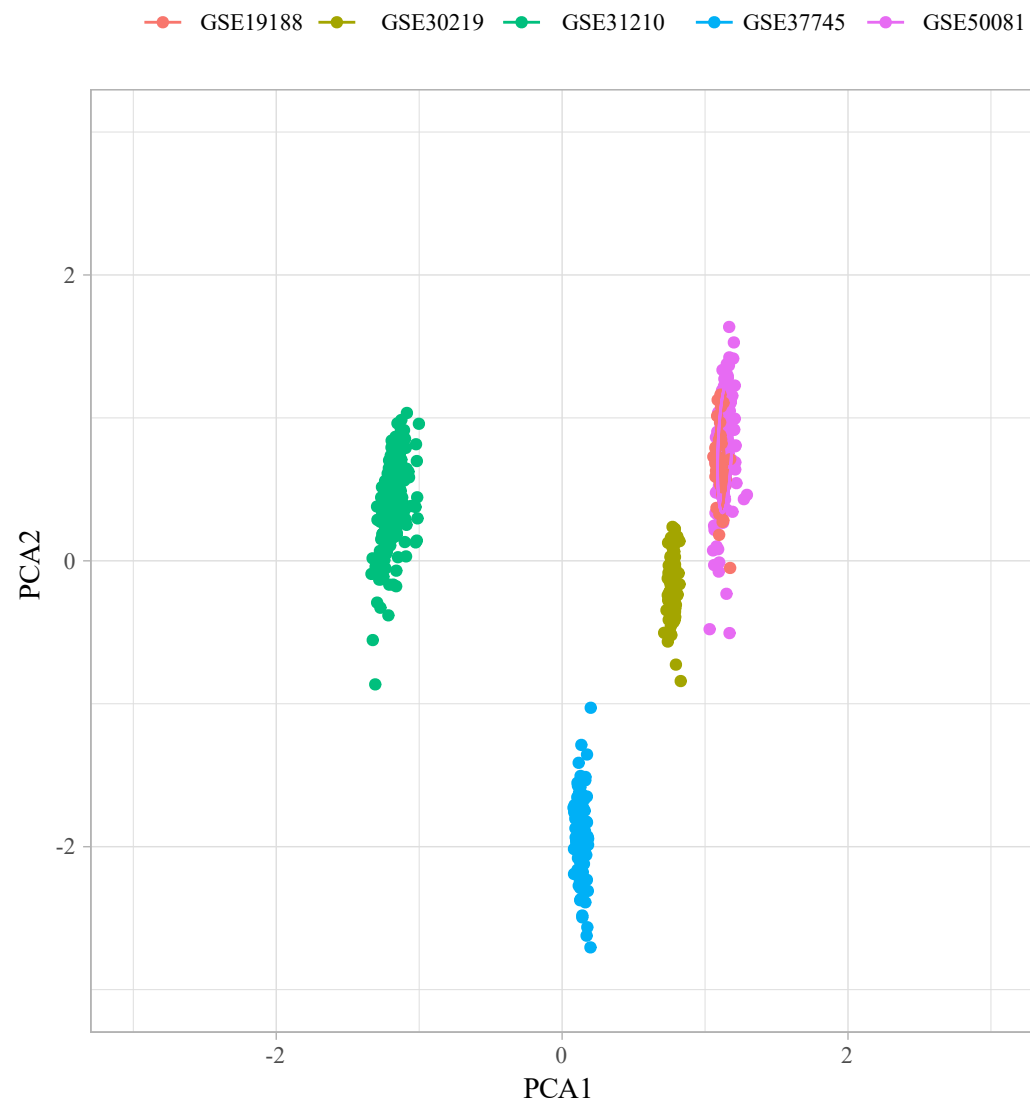

B

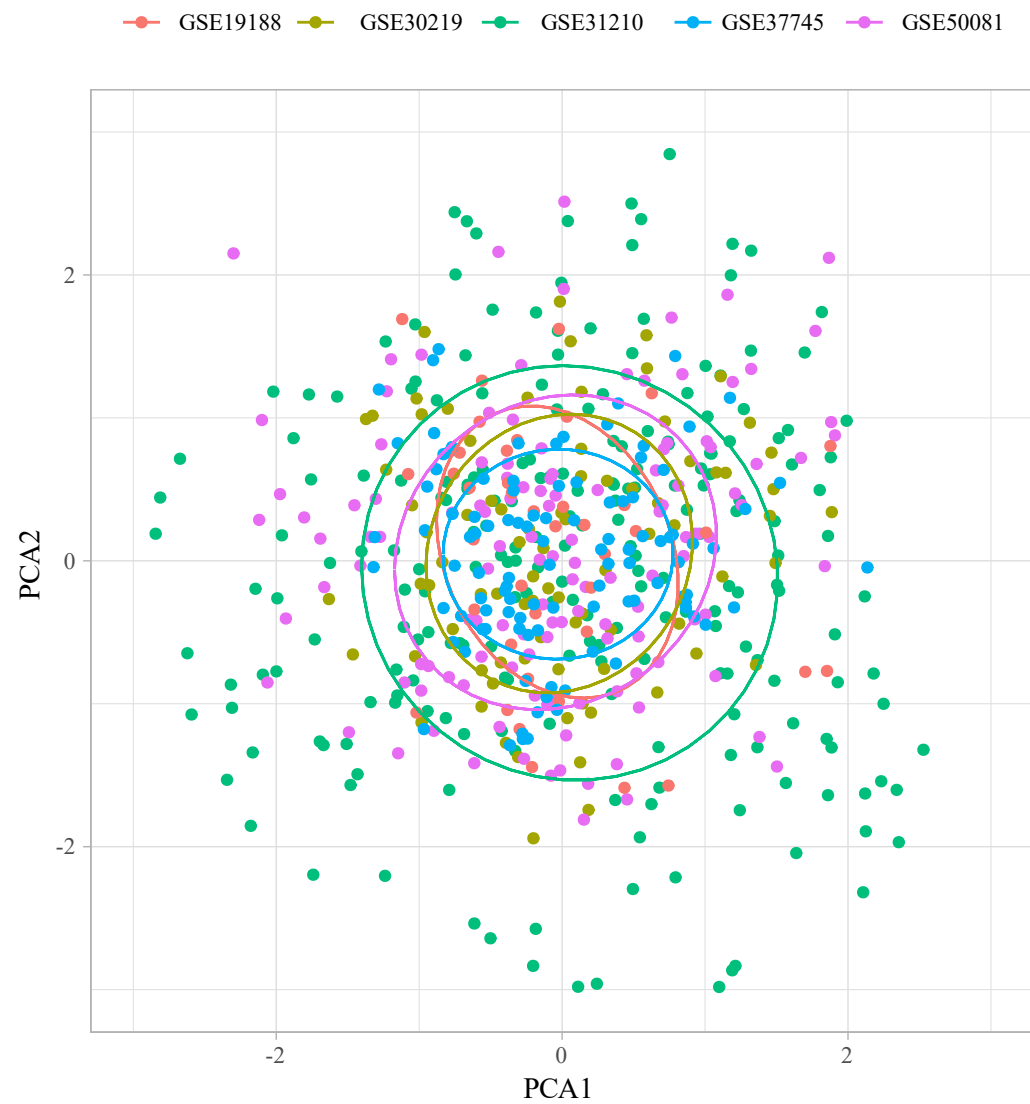

Supplement: f1 [file 8802573.f1.zip]
